# Supplementary material for: ATGL links insulin dysregulation to insulin resistance in adolescents with obesity and hepatosteatosis
Source: JCI journal article supplement (doi:10.1172/jci184740), 2025-03-16
Supplement: sd1 [file 1]

## Supplemental Figure 1

A

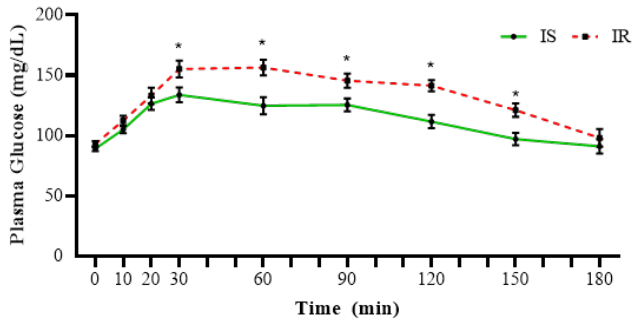

B

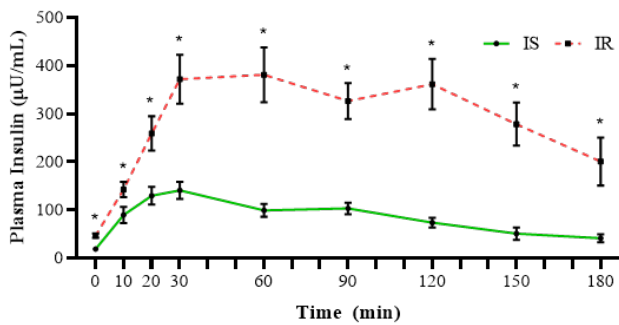

C

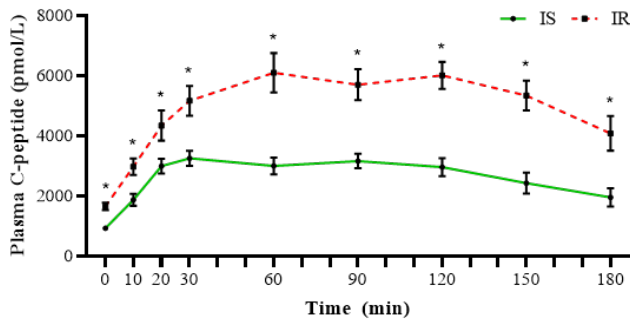

**Supplemental Figure 1.** Plasma glucose (panel A), insulin (panel B), and C-peptide (panel C) responses to the 3-hour OGTT were significantly greater in IR compared to IS subjects. Data are presented as means  $\pm$  S.D.. The \* indicates a significant difference in the IR relative to IS subject group at each respective time point.

Supplemental Figure 2

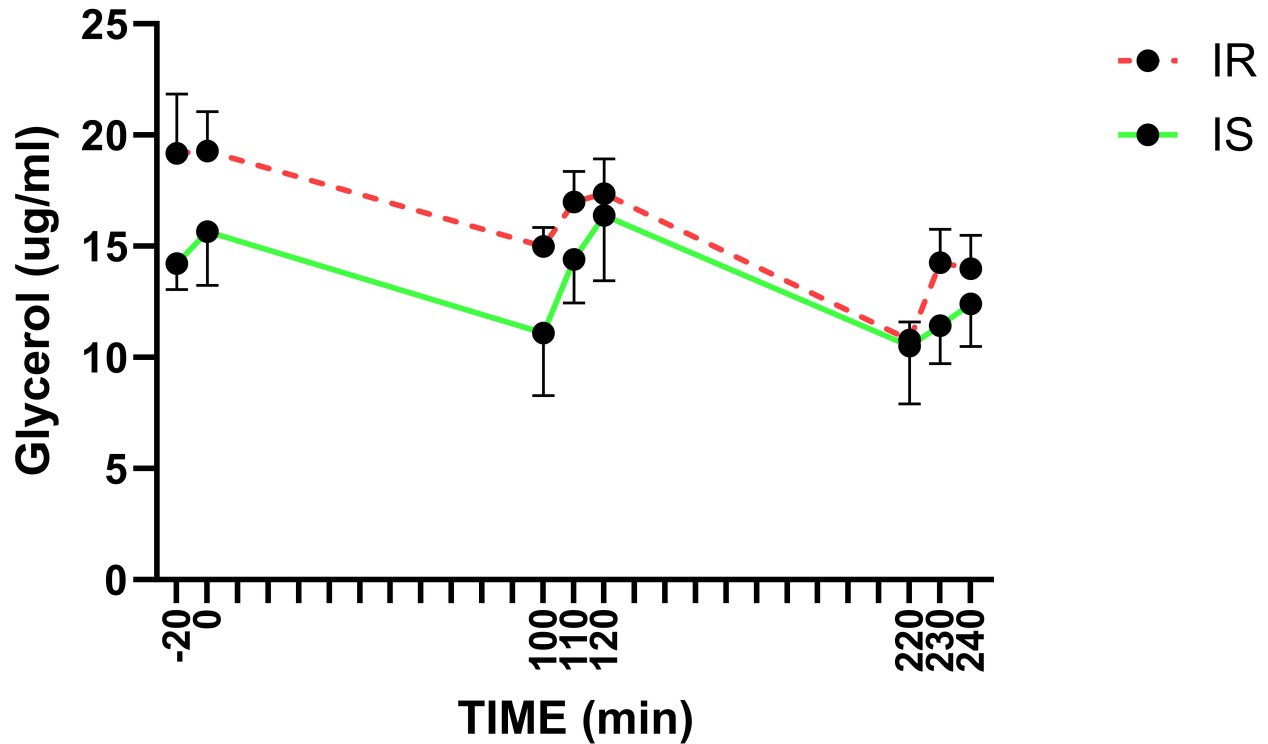

**Supplemental figure 2.** The figure shows plasma glycerol concentrations during the different phases of the HEC. There was no difference between the two groups in terms of plasma glycerol during the study.
