# Supplementary material for: ATGL links insulin dysregulation to insulin resistance in adolescents with obesity and hepatosteatosis
Source: JCI journal article supplement (doi:10.1172/jci184740), 2025-03-16
Supplement: sd3 [file 3]

Figure 2

C

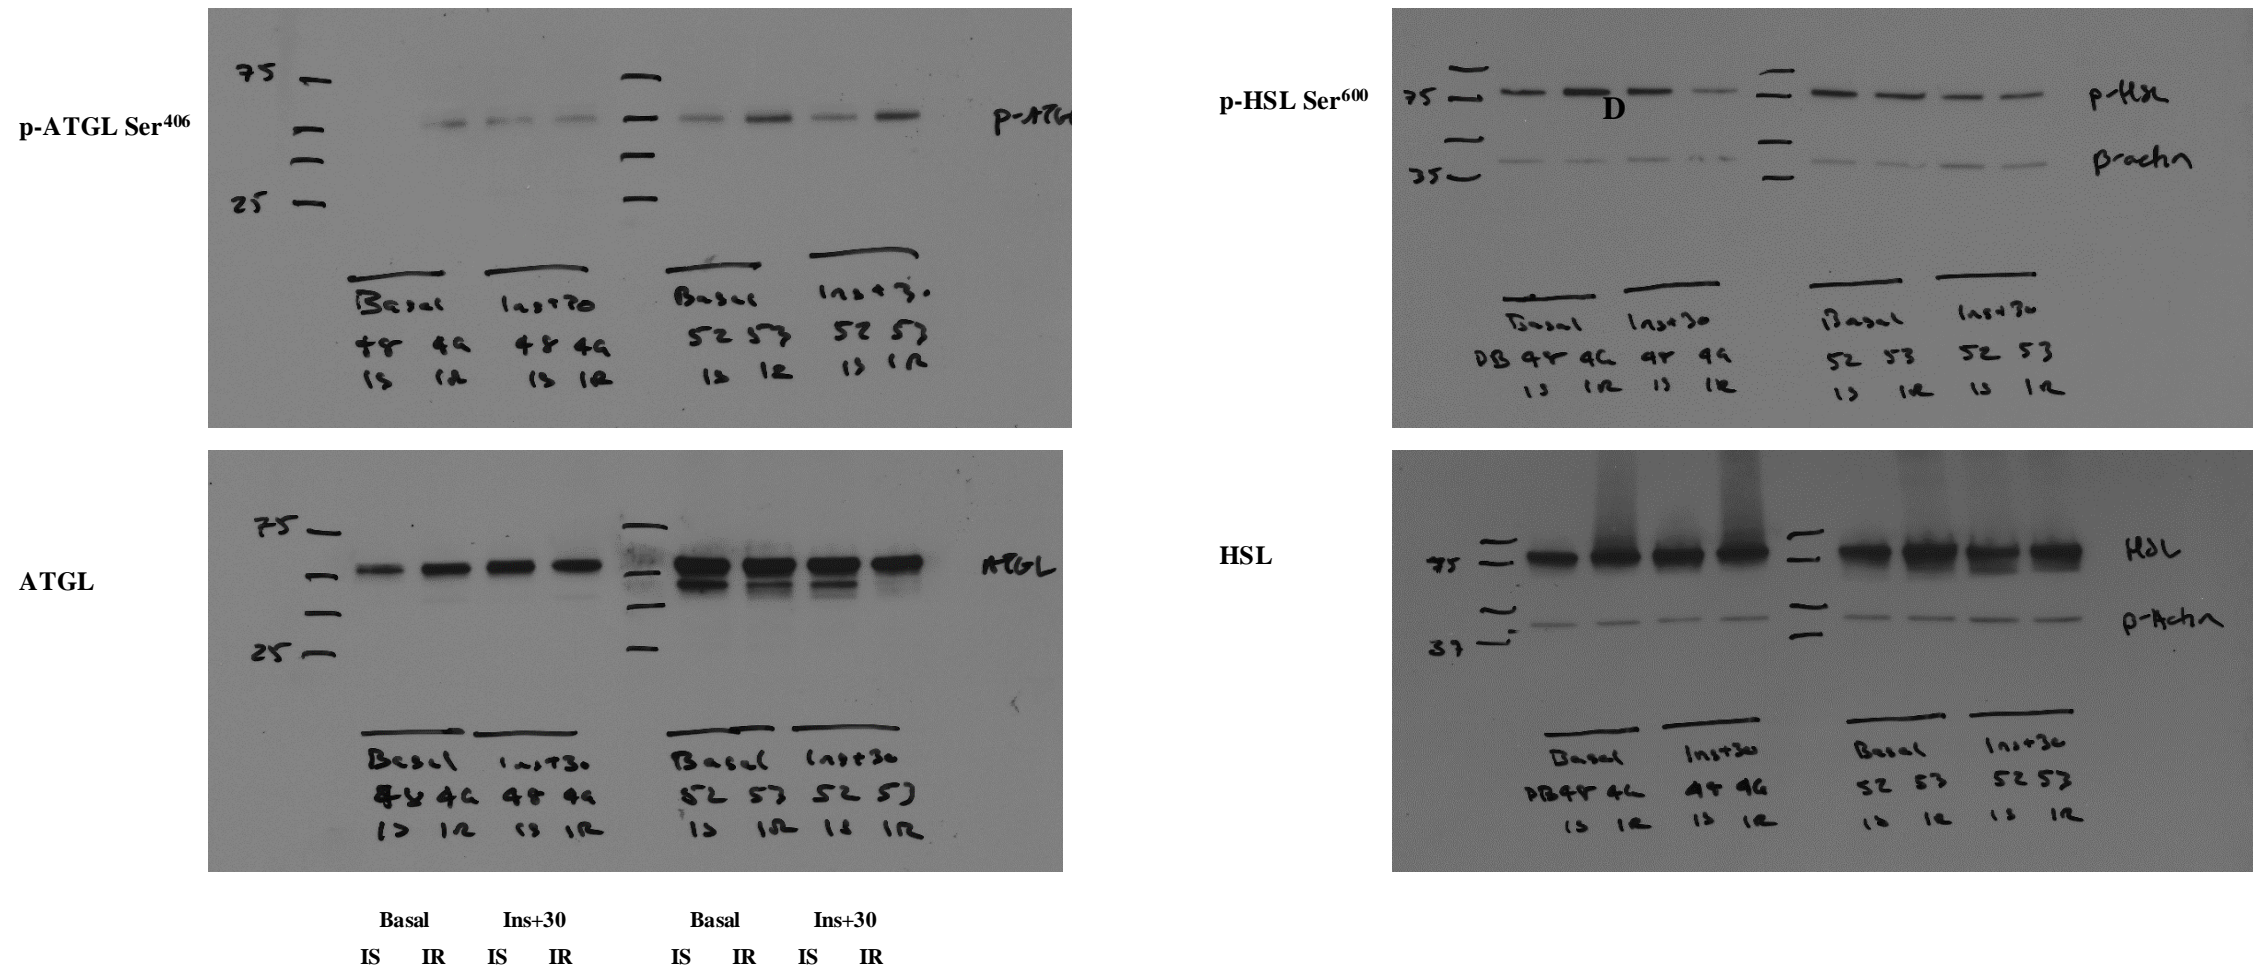

Figure 2. Unedited western blots images for the ratios of p-ATGL (Ser<sup>406</sup>)-to-ATGL and p-HSL (Ser<sup>600</sup>)-to-HSL prior to and in response to acute, low-dose insulin infusion (30-minutes following the initiation of 8 mU·m<sup>-2</sup>·min<sup>-1</sup> insulin). Image sets on the right were use as representative images.
